# Supplementary material
Source: Research Square preprint supplement (doi:10.21203/rs.3.rs-9702020/v1)
Supplement: Supplementary file 1 [file ba3d74cfbb155f8afc66339c.xlsx]

## Sheet: README
Table S1

## Sheet: S1 Risk Loci Meta
topLeadSNP

## Sheet: S2 Risk Loci DME_1
topLeadSNP

## Sheet: S3 Gene Set Analysis
FULL_NAME

## Sheet: S4 Tissue Analysis
FULL_NAME

## Sheet: S5 Siletti Seeker L2 Analysis
Dataset

## Sheet: S6 DropViz L2 Analysis
Dataset
